# Supplementary material for: CRISPR/Cas9 Directed Reprogramming of iPSC for Accelerated Motor Neuron Differentiation Leads to Dysregulation of Neuronal Fate Patterning and Function
Source: MDPI journal article supplement (doi:10.3390/ijms242216161), 2023-11-10
Supplement: s1 [file s1]

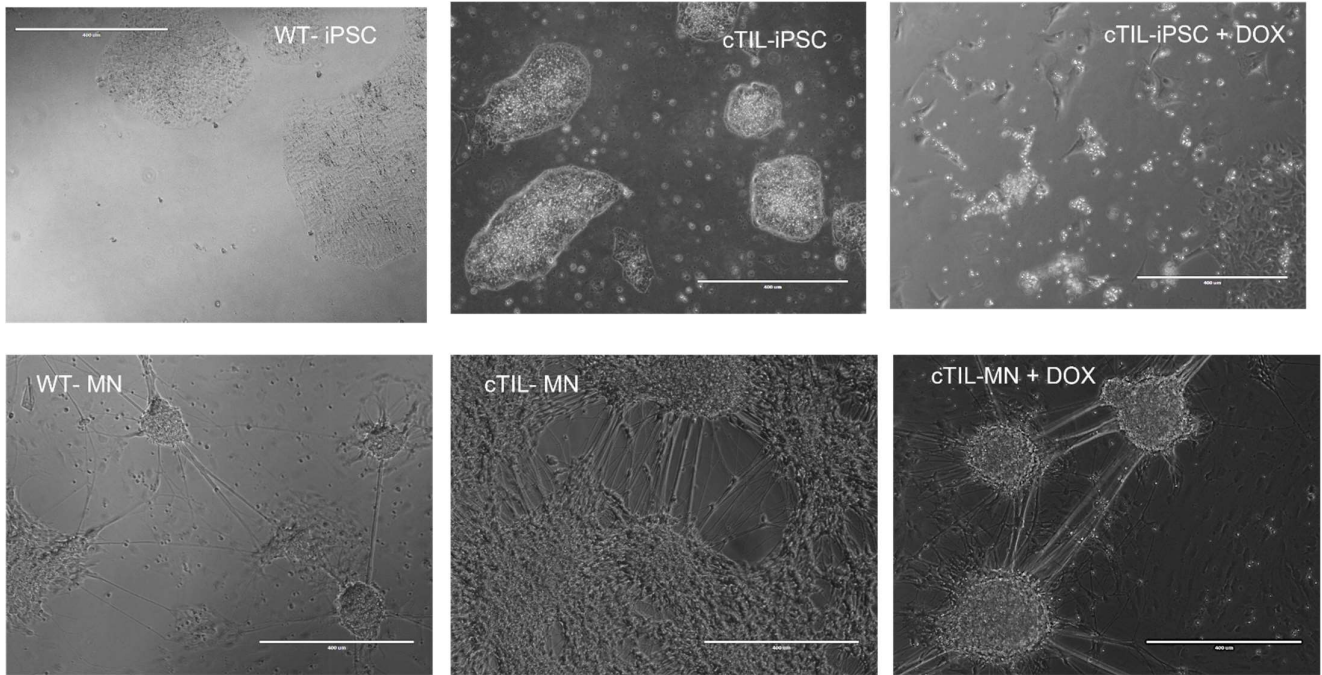

**Supplementary Figure S1.** Stimulation of transgene ISL1 and LHX3 with TET-ON system does not lead to unidirectional reprogramming of iPSC to mature MNs. Bright field micrographs depicting morphology of wild type (WTC11) and cTIL -modified iPSC and corresponding mature motor neurons (MNs) derived via standardized protocol with differentiation media supplemented with neuron patterning molecules. Upper panel compares the morphology of unmodified iPSC (wild type, WT) and cTIL-modified iPSC without Dox and with Dox added to neuronal differentiation media without small molecules acting as MN patterning factors. The lower panel shows morphology of mature MNs derived from unmodified iPSC and cTIL-modified iPSC in media supplemented with neuron patterning factors, as described in the Methods and Figure 1 A schematic model.

**Supplementary Table S1**

| Gene     | Description                                            | LogFC      | p-adjusted | Time    |
|----------|--------------------------------------------------------|------------|------------|---------|
| NTRK2    | neurotrophic receptor tyrosine kinase 2                | 8.88227    | 4.5978E-46 | D0-D7   |
| NTRK1    | neurotrophic receptor tyrosine kinase 1                | 4.1871677  | 9.0515E-06 | D0-D7   |
| NTRK2    | neurotrophic receptor tyrosine kinase 2                | 1.8007824  | 0.00057139 | D13-D18 |
| ERBB4    | erb-b2 receptor tyrosine kinase 4                      | 6.9227036  | 2.3277E-23 | D7-D13  |
| ERBB4    | erb-b2 receptor tyrosine kinase 4                      | -3.3669753 | 3.1959E-06 | D18-D28 |
| FLT1     | fms related receptor tyrosine kinase 1                 | -5.7320652 | 4.2518E-19 | D0-D7   |
| FLNC     | filamin C                                              | 2.9279217  | 5.7635E-19 | D0-D7   |
| FLNC     | filamin C                                              | -1.4229274 | 0.00011955 | D7-D13  |
| KDR      | kinase insert domain receptor                          | -6.4478754 | 2.8953E-18 | D0-D7   |
| KDR      | kinase insert domain receptor                          | 5.3643479  | 3.2684E-14 | D18-D28 |
| ERBB3    | erb-b2 receptor tyrosine kinase 3                      | -2.8062189 | 3.5223E-17 | D0-D7   |
| ERBB3    | erb-b2 receptor tyrosine kinase 3                      | -2.7958355 | 5.5391E-09 | D7-D13  |
| RASGRP2  | RAS guanyl releasing protein 2                         | -5.3519632 | 3.085E-15  | D0-D7   |
| FOS      | Fos proto-oncogene; AP-1 transcription factor subunit  | -2.7147721 | 8.884E-08  | D7-D13  |
| FOS      | Fos proto-oncogene; AP-1 transcription factor subunit  | 3.6919292  | 8.793E-15  | D18-D28 |
| FGFR1    | fibroblast growth factor receptor 1                    | -1.8535704 | 1.7613E-12 | D18-D28 |
| CACNA2D3 | calcium voltage-gated channel auxiliary subunit alpha1 | 5.136164   | 2.2223E-12 | D7-D13  |
| DUSP6    | dual specificity phosphatase 6                         | -2.6856203 | 5.7463E-12 | D7-D13  |
| FGFR4    | fibroblast growth factor receptor 4                    | -2.9726949 | 2.5063E-11 | D7-D13  |
| MRAS     | muscle RAS oncogene homolog                            | 1.5217684  | 1.155E-10  | D18-D28 |
| EGFR     | epidermal growth factor receptor                       | 1.739147   | 0.00022585 | D0-D7   |
| EGFR     | epidermal growth factor receptor                       | 1.6603308  | 0.00081668 | D7-D13  |
| EGFR     | epidermal growth factor receptor                       | -2.8071776 | 3.6943E-10 | D18-D28 |
| KITLG    | KIT ligand                                             | 4.4290402  | 5.4219E-10 | D0-D7   |
| PPM1B    | protein phosphatase; Mg2+/Mn2+ dependent 1B            | -1.2845459 | 9.5905E-10 | D0-D7   |
| EFNA5    | ephrin A5                                              | 3.7281509  | 1.8725E-09 | D0-D7   |
| NFATC3   | nuclear factor of activated T cells 3                  | -1.2425845 | 2.3611E-09 | D18-D28 |
| IL1RAP   | interleukin 1 receptor accessory protein               | 2.7526523  | 3.5887E-09 | D18-D28 |
| TNFRSF1A | TNF receptor superfamily member 1A                     | -1.3191865 | 0.00195182 | D0-D7   |
| TNFRSF1A | TNF receptor superfamily member 1A                     | 2.4071472  | 3.9514E-09 | D18-D28 |
| FGF9     | fibroblast growth factor 9                             | 3.6133501  | 6.7822E-09 | D0-D7   |
| TGFB2    | transforming growth factor beta 2                      | 3.3889104  | 9.3355E-09 | D0-D7   |
| TGFB2    | transforming growth factor beta 2                      | 3.0763147  | 8.2648E-09 | D7-D13  |
| PTPN5    | protein tyrosine phosphatase non-receptor type 5       | 2.4445749  | 1.4913E-08 | D18-D28 |
| TGFBR2   | transforming growth factor beta receptor 2             | 2.9012801  | 2.0721E-08 | D18-D28 |
| FGFR3    | fibroblast growth factor receptor 3                    | 2.7895976  | 8.0706E-05 | D0-D7   |
| FGFR3    | fibroblast growth factor receptor 3                    | -3.8222905 | 2.385E-08  | D18-D28 |
| ARRB1    | arrestin beta 1                                        | 1.6662265  | 3.7008E-08 | D0-D7   |
| ARRB1    | arrestin beta 1                                        | 1.4987329  | 3.849E-06  | D13-D18 |
| ARRB1    | arrestin beta 1                                        | 1.0516625  | 0.00042454 | D18-D28 |
| PDGFC    | platelet derived growth factor C                       | 2.9939718  | 5.6208E-08 | D0-D7   |
| CACNA1E  | calcium voltage-gated channel subunit alpha1 E         | 2.644264   | 5.8761E-08 | D18-D28 |
| CACNG8   | calcium voltage-gated channel auxiliary subunit gamma8 | -2.6038966 | 0.00053895 | D0-D7   |

|          |                                                           |            |            |         |
|----------|-----------------------------------------------------------|------------|------------|---------|
| CACNG5   | calcium voltage-gated channel auxiliary subunit gamma 5   | -6.2275401 | 1.4652E-07 | D0-D7   |
| CACNG7   | calcium voltage-gated channel auxiliary subunit gamma 7   | -2.3644877 | 2.9701E-07 | D0-D7   |
| CACNG4   | calcium voltage-gated channel auxiliary subunit gamma 4   | 1.5320602  | 0.00012389 | D7-D13  |
| CACNA1B  | calcium voltage-gated channel subunit alpha1 B            | 2.1171802  | 0.00022933 | D7-D13  |
| CACNG2   | calcium voltage-gated channel auxiliary subunit gamma 2   | 2.9925225  | 0.00124106 | D13-D18 |
| CACNG2   | calcium voltage-gated channel auxiliary subunit gamma 2   | 3.0882774  | 1.0393E-06 | D18-D28 |
| CACNG7   | calcium voltage-gated channel auxiliary subunit gamma 7   | 1.7836079  | 0.00025406 | D18-D28 |
| DUSP5    | dual specificity phosphatase 5                            | -3.9097612 | 7.6268E-07 | D7-D13  |
| MAPKAPK2 | MAPK activated protein kinase 2                           | 0.9517235  | 4.951E-05  | D0-D7   |
| MAPKAPK2 | MAPK activated protein kinase 2                           | -1.1455774 | 7.9786E-07 | D18-D28 |
| FGFR2    | fibroblast growth factor receptor 2                       | -3.1058238 | 8.0964E-07 | D18-D28 |
| MYC      | MYC proto-oncogene; bHLH transcription factor             | -2.8424857 | 8.2798E-07 | D0-D7   |
| PDGFA    | platelet derived growth factor subunit A                  | -3.9444139 | 9.074E-07  | D7-D13  |
| PDGFA    | platelet derived growth factor subunit A                  | 3.1698565  | 1.3847E-05 | D18-D28 |
| MECOM    | MDS1 and EVI1 complex locus                               | 2.124274   | 3.3779E-05 | D0-D7   |
| MECOM    | MDS1 and EVI1 complex locus                               | -2.3966538 | 2.1038E-06 | D18-D28 |
| CACNA2D1 | calcium voltage-gated channel auxiliary subunit alpha1 D1 | -3.0994629 | 2.7524E-06 | D0-D7   |
| CACNA2D1 | calcium voltage-gated channel auxiliary subunit alpha1 D1 | 2.7476582  | 0.00011623 | D7-D13  |
| KIT      | KIT proto-oncogene; receptor tyrosine kinase              | 1.8017807  | 0.00019001 | D0-D7   |
| KIT      | KIT proto-oncogene; receptor tyrosine kinase              | -1.8502092 | 0.00029342 | D7-D13  |
| KIT      | KIT proto-oncogene; receptor tyrosine kinase              | -2.5618877 | 3.4086E-06 | D18-D28 |
| MAP4K2   | mitogen-activated protein kinase kinase kinase kinase 2   | -1.8874145 | 3.6131E-06 | D0-D7   |
| MAP3K12  | mitogen-activated protein kinase kinase kinase 12         | 1.2090284  | 3.6168E-06 | D18-D28 |
| CSF1     | colony stimulating factor 1                               | 2.421093   | 3.7443E-06 | D0-D7   |
| FLNB     | filamin B                                                 | 1.4359353  | 3.7861E-06 | D18-D28 |
| NTRK1    | neurotrophic receptor tyrosine kinase 1                   | 4.1871677  | 9.0515E-06 | D0-D7   |
| CACNB3   | calcium voltage-gated channel auxiliary subunit beta 3    | 1.9231339  | 1.2224E-05 | D18-D28 |
| FAS      | Fas cell surface death receptor                           | 2.233471   | 1.7457E-05 | D0-D7   |
| FAS      | Fas cell surface death receptor                           | -1.8610346 | 0.00092509 | D7-D13  |
| CDC25B   | cell division cycle 25B                                   | -1.5032409 | 3.1998E-05 | D18-D28 |
| TRAF2    | TNF receptor associated factor 2                          | -1.0326828 | 8.6001E-05 | D0-D7   |
| GADD45B  | growth arrest and DNA damage inducible beta               | 4.2942885  | 0.00010322 | D18-D28 |
| RASGRP4  | RAS guanyl releasing protein 4                            | -3.4675482 | 0.00011295 | D0-D7   |
| GADD45A  | growth arrest and DNA damage inducible alpha              | 2.2220442  | 0.00018256 | D0-D7   |
| LAMTOR3  | late endosomal/lysosomal adaptor; MAPK and mTOR           | 1.4851472  | 0.00019762 | D18-D28 |
| MAP3K20  | mitogen-activated protein kinase kinase kinase 20         | -2.5772947 | 0.00021098 | D18-D28 |
| FGF19    | fibroblast growth factor 19                               | -5.9599903 | 0.00023948 | D0-D7   |
| RPS6KA3  | ribosomal protein S6 kinase A3                            | 1.3696894  | 0.00025118 | D0-D7   |
| MAPK13   | mitogen-activated protein kinase 13                       | -3.08838   | 0.0005015  | D0-D7   |
| HSPB1    | heat shock protein family B (small) member 1              | -1.9289181 | 0.00054449 | D0-D7   |
| HSPB1    | heat shock protein family B (small) member 1              | 1.9272991  | 0.00065762 | D18-D28 |
| MAP3K4   | mitogen-activated protein kinase kinase kinase 4          | -0.8959035 | 0.00056469 | D18-D28 |
| CACNB1   | calcium voltage-gated channel auxiliary subunit beta 1    | 1.9168376  | 0.00057486 | D18-D28 |
| RASGRF1  | Ras protein specific guanine nucleotide releasing factor  | 3.1356054  | 0.00061751 | D0-D7   |

|        |                                                  |            |            |         |
|--------|--------------------------------------------------|------------|------------|---------|
| AKT3   | AKT serine/threonine kinase 3                    | 2.154223   | 0.00064543 | D7-D13  |
| EGF    | epidermal growth factor                          | 2.6741765  | 0.00065483 | D0-D7   |
| EGF    | epidermal growth factor                          | -2.5177495 | 0.00176827 | D18-D28 |
| IGF1R  | insulin like growth factor 1 receptor            | -1.8022136 | 0.00083364 | D18-D28 |
| PAK2   | p21 (RAC1) activated kinase 2                    | 0.4974171  | 0.00092386 | D0-D7   |
| MAPK11 | mitogen-activated protein kinase 11              | 2.7329401  | 0.00124662 | D0-D7   |
| CASP3  | caspase 3                                        | 1.0963061  | 0.00130608 | D18-D28 |
| FGF17  | fibroblast growth factor 17                      | 3.6348486  | 0.00132701 | D0-D7   |
| FGF17  | fibroblast growth factor 17                      | 2.641559   | 0.0014852  | D18-D28 |
| MAP3K1 | mitogen-activated protein kinase kinase kinase 1 | 0.7530898  | 0.00136435 | D0-D7   |
| FGF5   | fibroblast growth factor 5                       | 5.6937525  | 0.00146246 | D18-D28 |
| NFKB1  | nuclear factor kappa B subunit 1                 | 1.5368973  | 0.00154879 | D0-D7   |
| ERBB2  | erb-b2 receptor tyrosine kinase 2                | -1.9443282 | 0.00191139 | D0-D7   |
| MAPK8  | mitogen-activated protein kinase 8               | -2.0954658 | 0.00198647 | D18-D28 |
| RAC3   | Rac family small GTPase 3                        | -1.4482906 | 0.10115004 | D0-D7   |

| Gene   | Description                                  | LogFC      | p-adjusted  | Time    |
|--------|----------------------------------------------|------------|-------------|---------|
| NTRK2  | neurotrophic receptor tyrosine kinase 2      | 8.88227    | 4.60E-46    | D0-D7   |
| NTRK2  | neurotrophic receptor tyrosine kinase 2      | 1.8007824  | 0.000571386 | D13-D18 |
| ERBB4  | erb-b2 receptor tyrosine kinase 4            | 6.9227036  | 2.33E-23    | D7-D13  |
| ERBB4  | erb-b2 receptor tyrosine kinase 4            | -3.3669753 | 3.20E-06    | D18-D28 |
| HTR7   | 5-hydroxytryptamine receptor 7               | -6.177465  | 2.14E-20    | D0-D7   |
| HTR7   | 5-hydroxytryptamine receptor 7               | 4.0824658  | 2.27E-09    | D18-D28 |
| FLT1   | fms related receptor tyrosine kinase 1       | -5.7320652 | 4.25E-19    | D0-D7   |
| KDR    | kinase insert domain receptor                | -6.4478754 | 2.90E-18    | D0-D7   |
| KDR    | kinase insert domain receptor                | 5.3643479  | 3.27E-14    | D18-D28 |
| P2RX3  | purinergic receptor P2X 3                    | 1.5632292  | 0.008671179 | D0-D7   |
| P2RX3  | purinergic receptor P2X 3                    | 3.5169144  | 4.32E-18    | D7-D13  |
| P2RX3  | purinergic receptor P2X 3                    | 1.4521127  | 0.002191076 | D13-D18 |
| ERBB3  | erb-b2 receptor tyrosine kinase 3            | -2.8062189 | 3.52E-17    | D0-D7   |
| ERBB3  | erb-b2 receptor tyrosine kinase 3            | -2.7958355 | 5.54E-09    | D7-D13  |
| ITPR3  | inositol 1;4;5-trisphosphate receptor type 3 | -3.4909883 | 8.18E-17    | D0-D7   |
| RET    | ret proto-oncogene                           | -4.2834617 | 1.28E-15    | D0-D7   |
| RET    | ret proto-oncogene                           | 3.1217043  | 1.44E-12    | D18-D28 |
| GRM1   | glutamate metabotropic receptor 1            | 2.8199093  | 3.08E-05    | D18-D28 |
| GNA14  | G protein subunit alpha 14                   | -5.4603243 | 5.35E-14    | D0-D7   |
| CHRM3  | cholinergic receptor muscarinic 3            | 4.4302275  | 6.15E-14    | D18-D28 |
| FGFR1  | fibroblast growth factor receptor 1          | -0.9110739 | 0.002274665 | D7-D13  |
| FGFR1  | fibroblast growth factor receptor 1          | -1.8535704 | 1.76E-12    | D18-D28 |
| ATP2A3 | ATPase sarcoplasmic/endoplasmic reticulum    | -3.7220136 | 2.43E-12    | D0-D7   |
| ATP2A3 | ATPase sarcoplasmic/endoplasmic reticulum    | 1.8720379  | 0.004483557 | D7-D13  |
| ATP2A3 | ATPase sarcoplasmic/endoplasmic reticulum    | -5.0739362 | 8.46E-05    | D18-D28 |
| FGFR4  | fibroblast growth factor receptor 4          | -1.1916313 | 0.005075853 | D0-D7   |
| FGFR4  | fibroblast growth factor receptor 4          | -2.9726949 | 2.51E-11    | D7-D13  |
| CCKBR  | cholecystokinin B receptor                   | -4.4340386 | 7.80E-11    | D0-D7   |
| PDE1A  | phosphodiesterase 1A                         | 2.9650025  | 0.00151213  | D0-D7   |
| PDE1A  | phosphodiesterase 1A                         | 3.2209116  | 4.21E-05    | D7-D13  |
| PDE1A  | phosphodiesterase 1A                         | -4.8373824 | 2.47E-10    | D18-D28 |
| ITPR2  | inositol 1;4;5-trisphosphate receptor type 2 | -3.9569499 | 2.90E-10    | D0-D7   |
| PLCE1  | phospholipase C epsilon 1                    | 4.1360108  | 3.19E-10    | D0-D7   |
| EGFR   | epidermal growth factor receptor             | 1.739147   | 0.000225852 | D0-D7   |
| EGFR   | epidermal growth factor receptor             | 1.6603308  | 0.000816683 | D7-D13  |
| EGFR   | epidermal growth factor receptor             | -2.8071776 | 3.69E-10    | D18-D28 |
| SLC8A1 | solute carrier family 8 member A1            | 3.0958936  | 3.37E-09    | D7-D13  |
| FGF9   | fibroblast growth factor 9                   | 3.6133501  | 6.78E-09    | D0-D7   |
| FGFR3  | fibroblast growth factor receptor 3          | 2.7895976  | 8.07E-05    | D0-D7   |
| FGFR3  | fibroblast growth factor receptor 3          | -3.8222905 | 2.39E-08    | D18-D28 |
| GRIN1  | glutamate ionotropic receptor NMDA type su   | 3.9431799  | 3.69E-08    | D18-D28 |
| PDGFC  | platelet derived growth factor C             | 2.9939718  | 5.62E-08    | D0-D7   |
| PDGFC  | platelet derived growth factor C             | 1.6311438  | 0.009088785 | D7-D13  |

|         |                                              |            |             |         |
|---------|----------------------------------------------|------------|-------------|---------|
| CACNA1E | calcium voltage-gated channel subunit alpha1 | 1.587637   | 0.007197192 | D7-D13  |
| CACNA1E | calcium voltage-gated channel subunit alpha1 | 2.644264   | 5.88E-08    | D18-D28 |
| PLCB3   | phospholipase C beta 3                       | -2.4812495 | 1.46E-07    | D0-D7   |
| CAMK2B  | calcium/calmodulin dependent protein kinase  | 2.5515258  | 2.84E-07    | D18-D28 |
| NOS1    | nitric oxide synthase 1                      | -3.8325012 | 6.02E-07    | D0-D7   |
| FGFR2   | fibroblast growth factor receptor 2          | -3.1058238 | 8.10E-07    | D18-D28 |
| PDGFA   | platelet derived growth factor subunit A     | -3.9444139 | 9.07E-07    | D7-D13  |
| PDGFA   | platelet derived growth factor subunit A     | 3.1698565  | 1.38E-05    | D18-D28 |
| ADCY2   | adenylate cyclase 2                          | -3.3586601 | 1.03E-06    | D0-D7   |
| ADCY2   | adenylate cyclase 2                          | 2.2691251  | 0.004367872 | D7-D13  |
| SLC8A3  | solute carrier family 8 member A3            | 3.3348294  | 1.72E-06    | D0-D7   |
| SLC8A3  | solute carrier family 8 member A3            | 1.5291393  | 0.008875811 | D18-D28 |
| ATP2B3  | ATPase plasma membrane Ca2+ transporting     | 4.6552579  | 2.07E-06    | D18-D28 |
| CAMK2A  | calcium/calmodulin dependent protein kinase  | 3.6297257  | 1.74E-05    | D0-D7   |
| CAMK2D  | calcium/calmodulin dependent protein kinase  | 2.4776227  | 3.05E-06    | D0-D7   |
| CAMK2A  | calcium/calmodulin dependent protein kinase  | 3.6297257  | 1.74E-05    | D0-D7   |
| CAMK2G  | calcium/calmodulin dependent protein kinase  | -0.6998203 | 0.00186652  | D0-D7   |
| CAMK4   | calcium/calmodulin dependent protein kinase  | 1.9630544  | 4.94E-05    | D7-D13  |
| RYR1    | ryanodine receptor 1                         | -2.1931211 | 3.42E-05    | D0-D7   |
| RYR2    | ryanodine receptor 2                         | 3.4913884  | 3.75E-06    | D18-D28 |
| GRPR    | gastrin releasing peptide receptor           | -3.634838  | 4.32E-06    | D0-D7   |
| ATP2B2  | ATPase plasma membrane Ca2+ transporting     | 2.4145517  | 7.54E-06    | D18-D28 |
| NTRK1   | neurotrophic receptor tyrosine kinase 1      | 4.1871677  | 9.05E-06    | D0-D7   |
| NTRK1   | neurotrophic receptor tyrosine kinase 1      | -2.3649505 | 0.005309894 | D18-D28 |
| GRIN2D  | glutamate ionotropic receptor NMDA type su   | -2.5464634 | 1.02E-05    | D0-D7   |
| GRIN2D  | glutamate ionotropic receptor NMDA type su   | 1.7472436  | 0.003637442 | D18-D28 |
| PLCG2   | phospholipase C gamma 2                      | -1.9009496 | 1.80E-05    | D0-D7   |
| ADRA1D  | adrenoceptor alpha 1D                        | 4.1272704  | 5.79E-05    | D18-D28 |
| EDNRB   | endothelin receptor type B                   | 1.7982777  | 0.010710313 | D7-D13  |
| EDNRB   | endothelin receptor type B                   | -2.3739425 | 0.00012481  | D18-D28 |
| HTR2A   | 5-hydroxytryptamine receptor 2A              | 2.0985519  | 0.000201697 | D18-D28 |
| PTGER3  | prostaglandin E receptor 3                   | 3.2949466  | 0.000217684 | D7-D13  |
| CACNA1B | calcium voltage-gated channel subunit alpha1 | 2.1171802  | 0.000229332 | D7-D13  |
| FGF19   | fibroblast growth factor 19                  | -5.9599903 | 0.000239484 | D0-D7   |
| HRH2    | histamine receptor H2                        | -2.3512069 | 0.007508993 | D0-D7   |
| HRH2    | histamine receptor H2                        | -4.3881151 | 0.000251157 | D18-D28 |
| MYLK    | myosin light chain kinase                    | -1.9932382 | 0.000252543 | D18-D28 |
| ADCY8   | adenylate cyclase 8                          | 3.2588981  | 0.000316714 | D7-D13  |
| VDAC1   | voltage dependent anion channel 1            | -1.216347  | 0.00033444  | D0-D7   |
| PLCB1   | phospholipase C beta 1                       | 2.5741385  | 0.00038703  | D0-D7   |
| ATP2B1  | ATPase plasma membrane Ca2+ transporting     | 1.4428461  | 0.000478206 | D0-D7   |
| PLCB2   | phospholipase C beta 2                       | -2.2965118 | 0.000650156 | D0-D7   |
| EGF     | epidermal growth factor                      | 2.6741765  | 0.000654829 | D0-D7   |
| EGF     | epidermal growth factor                      | -2.5177495 | 0.001768266 | D18-D28 |



|          |                                               |            |             |         |
|----------|-----------------------------------------------|------------|-------------|---------|
| PHKA1    | phosphorylase kinase regulatory subunit alpha | 1.2778975  | 0.000885055 | D0-D7   |
| NTRK3    | neurotrophic receptor tyrosine kinase 3       | 1.5190976  | 0.001213945 | D0-D7   |
| NTRK3    | neurotrophic receptor tyrosine kinase 3       | 1.5901428  | 0.001051593 | D7-D13  |
| CXCR4    | C-X-C motif chemokine receptor 4              | 2.9330094  | 0.001076283 | D0-D7   |
| SLC8A2   | solute carrier family 8 member A2             | -3.0461997 | 0.001086587 | D0-D7   |
| SLC8A2   | solute carrier family 8 member A2             | 2.8143064  | 0.004029173 | D18-D28 |
| FGF17    | fibroblast growth factor 17                   | 3.6348486  | 0.001327014 | D0-D7   |
| FGF17    | fibroblast growth factor 17                   | 2.641559   | 0.001485202 | D18-D28 |
| FGF5     | fibroblast growth factor 5                    | 5.6937525  | 0.001462456 | D18-D28 |
| CAMK2G   | calcium/calmodulin dependent protein kinase   | -0.6998203 | 0.00186652  | D0-D7   |
| ERBB2    | erb-b2 receptor tyrosine kinase 2             | -1.9443282 | 0.001911392 | D0-D7   |
| PDGFRB   | platelet derived growth factor receptor beta  | 1.9504428  | 0.002226192 | D18-D28 |
| PDE1B    | phosphodiesterase 1B                          | 2.0153474  | 0.00870672  | D0-D7   |
| PDE1B    | phosphodiesterase 1B                          | -2.4652831 | 0.002450414 | D7-D13  |
| ADRA1B   | adrenoceptor alpha 1B                         | 5.2505205  | 0.002889806 | D0-D7   |
| CALM2    | calmodulin 2                                  | 1.0380034  | 0.003157836 | D18-D28 |
| TACR3    | tachykinin receptor 3                         | -1.7318712 | 0.003194541 | D0-D7   |
| ADRA1A   | adrenoceptor alpha 1A                         | 3.9027325  | 0.003248004 | D18-D28 |
| MST1     | macrophage stimulating 1                      | 1.4482651  | 0.00364194  | D18-D28 |
| RYR3     | ryanodine receptor 3                          | 2.0600879  | 0.003654632 | D0-D7   |
| VEGFC    | vascular endothelial growth factor C          | 2.453796   | 0.003686182 | D7-D13  |
| HRC      | histidine rich calcium binding protein        | -3.2993125 | 0.003900004 | D0-D7   |
| TRDN     | triadin                                       | -3.3252433 | 0.004123503 | D0-D7   |
| CHRM2    | cholinergic receptor muscarinic 2             | 5.066906   | 0.00415318  | D0-D7   |
| CALM1    | calmodulin 1                                  | 1.200185   | 0.004333244 | D18-D28 |
| SLC25A31 | solute carrier family 25 member 31            | 5.3265982  | 0.004396948 | D0-D7   |
| PDGFD    | platelet derived growth factor D              | 1.8743636  | 0.004658379 | D18-D28 |
| HTR2C    | 5-hydroxytryptamine receptor 2C               | -3.228322  | 0.004748108 | D0-D7   |
| CACNA1D  | calcium voltage-gated channel subunit alpha1  | 1.9281574  | 0.00548549  | D0-D7   |
| FGF1     | fibroblast growth factor 1                    | -2.6098033 | 0.005857654 | D0-D7   |
| ADCY1    | adenylate cyclase 1                           | 0.7168792  | 0.005911127 | D18-D28 |
| FGF10    | fibroblast growth factor 10                   | -2.6561533 | 0.006743216 | D18-D28 |
| PHKG2    | phosphorylase kinase catalytic subunit gamma  | -1.0707616 | 0.006953261 | D0-D7   |
| TNNC1    | troponin C1; slow skeletal and cardiac type   | -4.1962737 | 0.007129734 | D7-D13  |
| SPHK2    | sphingosine kinase 2                          | -1.4584291 | 0.007132653 | D0-D7   |
| VEGFB    | vascular endothelial growth factor B          | -1.7684136 | 0.007252917 | D0-D7   |
| STIM1    | stromal interaction molecule 1                | 0.8309992  | 0.007798559 | D0-D7   |
| PTGFR    | prostaglandin F receptor                      | 3.8266955  | 0.007911383 | D18-D28 |
| PRKCA    | protein kinase C alpha                        | 1.7943984  | 0.008573289 | D0-D7   |
| DRD1     | dopamine receptor D1                          | 7.8034365  | 0.008891529 | D18-D28 |
| PRKACA   | protein kinase cAMP-activated catalytic subu  | 2.8758522  | 0.00964806  | D13-D18 |
| SLC25A4  | solute carrier family 25 member 4             | 1.3962874  | 0.00969237  | D18-D28 |
| MCOLN2   | mucolipin TRP cation channel 2                | -1.9269193 | 0.010021052 | D0-D7   |
| CYSLTR2  | cysteinyl leukotriene receptor 2              | 4.5362914  | 0.010121454 | D7-D13  |

| Gene   | Description                                        | LogFC       | p-adjusted  | Time    |
|--------|----------------------------------------------------|-------------|-------------|---------|
| CNR1   | cannabinoid receptor 1                             | 3.302180901 | 9.73E-16    | D0-D7   |
| CNR1   | cannabinoid receptor 1                             | 3.286858239 | 1.26E-25    | D7-D13  |
| GABRA5 | gamma-aminobutyric acid type A receptor subunit 5  | -4.33140428 | 2.00E-20    | D0-D7   |
| GABRA5 | gamma-aminobutyric acid type A receptor subunit 5  | 1.964794108 | 0.000137175 | D18-D28 |
| HTR7   | 5-hydroxytryptamine receptor 7                     | -6.17746505 | 2.14E-20    | D0-D7   |
| HTR7   | 5-hydroxytryptamine receptor 7                     | 4.082465824 | 2.27E-09    | D18-D28 |
| APLNR  | apelin receptor                                    | 3.208827929 | 2.53E-11    | D0-D7   |
| APLNR  | apelin receptor                                    | -4.74777872 | 5.30E-20    | D7-D13  |
| P2RX3  | purinergic receptor P2X 3                          | 3.516914417 | 4.32E-18    | D7-D13  |
| P2RX3  | purinergic receptor P2X 3                          | 1.452112729 | 0.002191076 | D13-D18 |
| GRID2  | glutamate ionotropic receptor delta type subunit 2 | -5.00680967 | 1.09E-15    | D0-D7   |
| GRID2  | glutamate ionotropic receptor delta type subunit 2 | 2.638872665 | 9.95E-05    | D18-D28 |
| DRD2   | dopamine receptor D2                               | 6.358150766 | 1.48E-15    | D0-D7   |
| DRD2   | dopamine receptor D2                               | -2.56864449 | 0.000132274 | D18-D28 |
| NPY1R  | neuropeptide Y receptor Y1                         | -3.67602331 | 2.52E-15    | D0-D7   |
| NPY1R  | neuropeptide Y receptor Y1                         | 2.002608281 | 0.000147642 | D18-D28 |
| CHRNB4 | cholinergic receptor nicotinic beta 4 subunit      | 2.909827054 | 9.15E-15    | D0-D7   |
| CHRNB4 | cholinergic receptor nicotinic beta 4 subunit      | -2.0305826  | 2.18E-07    | D18-D28 |
| NR3C1  | nuclear receptor subfamily 3 group C member 1      | -2.13666053 | 0.000109938 | D0-D7   |
| NR3C1  | nuclear receptor subfamily 3 group C member 1      | 4.001445828 | 1.55E-14    | D7-D13  |
| NR3C1  | nuclear receptor subfamily 3 group C member 1      | -2.33199054 | 1.88E-05    | D18-D28 |
| GABRB3 | gamma-aminobutyric acid type A receptor subunit 3  | -3.21222464 | 1.97E-14    | D0-D7   |
| GABRB3 | gamma-aminobutyric acid type A receptor subunit 3  | 2.081524155 | 7.03E-06    | D7-D13  |
| GABRB1 | gamma-aminobutyric acid type A receptor subunit 1  | 5.509424436 | 5.45E-14    | D7-D13  |
| GABRB1 | gamma-aminobutyric acid type A receptor subunit 1  | -2.94589554 | 0.000859739 | D13-D18 |
| CHRM3  | cholinergic receptor muscarinic 3                  | 4.430227476 | 6.15E-14    | D18-D28 |
| CHRNA3 | cholinergic receptor nicotinic alpha 3 subunit     | 2.498934037 | 1.12E-13    | D0-D7   |
| CHRNA3 | cholinergic receptor nicotinic alpha 3 subunit     | -1.39435502 | 5.00E-05    | D18-D28 |
| SSTR1  | somatostatin receptor 1                            | 8.347220454 | 4.41E-13    | D18-D28 |
| GRIA1  | glutamate ionotropic receptor AMPA type subunit 1  | 3.773801329 | 5.47E-13    | D0-D7   |
| GRM4   | glutamate metabotropic receptor 4                  | -4.29862559 | 8.37E-13    | D0-D7   |
| NTS    | neurotensin                                        | -9.52122218 | 7.01E-12    | D0-D7   |
| CCKBR  | cholecystokinin B receptor                         | -4.4340386  | 7.80E-11    | D0-D7   |
| NPY5R  | neuropeptide Y receptor Y5                         | -3.76631039 | 4.78E-10    | D0-D7   |
| NPY5R  | neuropeptide Y receptor Y5                         | 3.204181836 | 5.08E-05    | D18-D28 |
| HTR1E  | 5-hydroxytryptamine receptor 1E                    | 5.765083081 | 5.84E-10    | D18-D28 |
| GLRA3  | glycine receptor alpha 3                           | 5.29254682  | 1.66E-09    | D18-D28 |
| LPAR3  | lysophosphatidic acid receptor 3                   | -1.64370677 | 0.000764733 | D0-D7   |
| LPAR3  | lysophosphatidic acid receptor 3                   | -3.61026401 | 1.81E-09    | D7-D13  |
| P2RY1  | purinergic receptor P2Y1                           | -2.37226962 | 9.25E-09    | D0-D7   |
| GRIN2B | glutamate ionotropic receptor NMDA type subunit 2B | 4.034542268 | 2.56E-08    | D18-D28 |
| GRIN1  | glutamate ionotropic receptor NMDA type subunit 1  | 3.943179939 | 3.69E-08    | D18-D28 |
| GRIA2  | glutamate ionotropic receptor AMPA type subunit 2  | 3.802233924 | 7.76E-08    | D7-D13  |



|         |                                                    |             |             |         |
|---------|----------------------------------------------------|-------------|-------------|---------|
| GRIA2   | glutamate ionotropic receptor AMPA type subunit    | 2.040217859 | 0.000713097 | D13-D18 |
| GRIA2   | glutamate ionotropic receptor AMPA type subunit    | 2.102485586 | 1.82E-05    | D18-D28 |
| HTR1D   | 5-hydroxytryptamine receptor 1D                    | 3.880875361 | 1.03E-07    | D0-D7   |
| HTR1D   | 5-hydroxytryptamine receptor 1D                    | -3.82719626 | 6.93E-07    | D18-D28 |
| TRH     | thyrotropin releasing hormone                      | 5.055501219 | 2.57E-07    | D18-D28 |
| CHRNA5  | cholinergic receptor nicotinic alpha 5 subunit     | -2.16913037 | 2.73E-07    | D18-D28 |
| GLRB    | glycine receptor beta                              | 3.498364714 | 3.99E-07    | D0-D7   |
| GRIA3   | glutamate ionotropic receptor AMPA type subunit    | 2.954700849 | 4.26E-07    | D7-D13  |
| ADCYAP1 | adenylate cyclase activating polypeptide 1         | 3.705191323 | 7.62E-07    | D13-D18 |
| HCRTR2  | hypocretin receptor 2                              | 3.485746081 | 1.32E-06    | D18-D28 |
| S1PR1   | sphingosine-1-phosphate receptor 1                 | 3.838225674 | 1.53E-06    | D0-D7   |
| GRPR    | gastrin releasing peptide receptor                 | -3.63483803 | 4.32E-06    | D0-D7   |
| GRIN2D  | glutamate ionotropic receptor NMDA type subunit    | -2.54646343 | 1.02E-05    | D0-D7   |
| GRIN3A  | glutamate ionotropic receptor NMDA type subunit    | 2.274265537 | 1.13E-05    | D18-D28 |
| PTGER4  | prostaglandin E receptor 4                         | 3.10376649  | 1.28E-05    | D18-D28 |
| F2      | coagulation factor II; thrombin                    | 4.149282931 | 1.31E-05    | D0-D7   |
| NMU     | neuromedin U                                       | -3.29629585 | 2.05E-05    | D18-D28 |
| GRIA4   | glutamate ionotropic receptor AMPA type subunit    | -2.22368812 | 2.85E-05    | D0-D7   |
| GRIA4   | glutamate ionotropic receptor AMPA type subunit    | 2.198761738 | 9.37E-05    | D7-D13  |
| GRM1    | glutamate metabotropic receptor 1                  | 2.819909301 | 3.08E-05    | D18-D28 |
| ADRA1D  | adrenoceptor alpha 1D                              | 4.127270423 | 5.79E-05    | D18-D28 |
| GLRA1   | glycine receptor alpha 1                           | 2.967428475 | 6.02E-05    | D0-D7   |
| GABRG1  | gamma-aminobutyric acid type A receptor subunit    | 3.96010845  | 8.51E-05    | D18-D28 |
| GABRG2  | gamma-aminobutyric acid type A receptor subunit    | 2.328574727 | 9.52E-05    | D13-D18 |
| GABRG2  | gamma-aminobutyric acid type A receptor subunit    | 1.823038178 | 8.51E-05    | D18-D28 |
| GABRR2  | gamma-aminobutyric acid type A receptor subunit    | 4.062352193 | 8.59E-05    | D0-D7   |
| MCHR1   | melanin concentrating hormone receptor 1           | -4.39419696 | 8.79E-05    | D0-D7   |
| GRIK2   | glutamate ionotropic receptor kainate type subunit | 2.734867375 | 0.000107548 | D7-D13  |
| ADRA2B  | adrenoceptor alpha 2B                              | -2.73077381 | 0.000111589 | D0-D7   |
| EDNRB   | endothelin receptor type B                         | -2.37394249 | 0.00012481  | D18-D28 |
| GPR156  | G protein-coupled receptor 156                     | -2.75855523 | 0.000125227 | D18-D28 |
| GABRA3  | gamma-aminobutyric acid type A receptor subunit    | 1.971521432 | 0.000174813 | D18-D28 |
| GRIK4   | glutamate ionotropic receptor kainate type subunit | -2.54987838 | 0.000198627 | D0-D7   |
| HTR2A   | 5-hydroxytryptamine receptor 2A                    | 2.098551877 | 0.000201697 | D18-D28 |
| GABRA2  | gamma-aminobutyric acid type A receptor subunit    | 2.741023754 | 0.000202806 | D18-D28 |
| GABRB2  | gamma-aminobutyric acid type A receptor subunit    | 2.448843168 | 0.000205827 | D0-D7   |
| PTGER3  | prostaglandin E receptor 3                         | 3.294946586 | 0.000217684 | D7-D13  |
| GHR     | growth hormone receptor                            | 2.512218713 | 0.000228086 | D0-D7   |
| TAC1    | tachykinin precursor 1                             | 3.931834981 | 0.000236671 | D18-D28 |
| HRH2    | histamine receptor H2                              | -4.38811506 | 0.000251157 | D18-D28 |
| CHRNA1  | cholinergic receptor nicotinic alpha 1 subunit     | 3.220303021 | 0.000315203 | D18-D28 |
| GRIK5   | glutamate ionotropic receptor kainate type subunit | -1.50789117 | 0.000585871 | D0-D7   |
| GRIK5   | glutamate ionotropic receptor kainate type subunit | -1.5290761  | 0.002142616 | D7-D13  |
| VIPR1   | vasoactive intestinal peptide receptor 1           | -2.55659158 | 0.000759443 | D0-D7   |

|        |                                                      |             |             |         |
|--------|------------------------------------------------------|-------------|-------------|---------|
| F2RL1  | F2R like trypsin receptor 1                          | -2.58197939 | 0.000770744 | D7-D13  |
| GRIK1  | glutamate ionotropic receptor kainate type subunit 1 | 2.160869812 | 0.000796106 | D0-D7   |
| PARD3  | par-3 family cell polarity regulator                 | -2.06486635 | 0.001381965 | D18-D28 |
| GRID1  | glutamate ionotropic receptor delta type subunit 1   | 2.736745457 | 0.001466048 | D0-D7   |
| ADM    | adrenomedullin                                       | -2.77582402 | 0.001625868 | D0-D7   |
| ADM    | adrenomedullin                                       | 3.606044725 | 0.002325252 | D18-D28 |
| GRIK3  | glutamate ionotropic receptor kainate type subunit 3 | -2.12712503 | 0.001629953 | D18-D28 |
| CRHR2  | corticotropin releasing hormone receptor 2           | -2.44946778 | 0.001680209 | D18-D28 |
| OPRK1  | opioid receptor kappa 1                              | -3.60859084 | 0.001721168 | D18-D28 |
| ADRA2A | adrenoceptor alpha 2A                                | 5.526810176 | 0.00209535  | D0-D7   |
| GIPR   | gastric inhibitory polypeptide receptor              | 3.328095301 | 0.002173243 | D18-D28 |

| Gene   | Description                                      | LogFC     | p-adjusted  | Time    |
|--------|--------------------------------------------------|-----------|-------------|---------|
| PLXNA2 | plexin A2                                        | 7.4555832 | 1.06E-40    | D0-D7   |
| PLXNA2 | plexin A2                                        | -2.031211 | 0.000452287 | D18-D28 |
| EPHA3  | EPH receptor A3                                  | 6.8439388 | 3.14E-37    | D7-D13  |
| DPYSL5 | dihydropyrimidinase like 5                       | 3.3730569 | 1.51E-35    | D0-D7   |
| EFNB2  | ephrin B2                                        | 4.0577767 | 2.37E-32    | D0-D7   |
| PTCH1  | patched 1                                        | 4.2484847 | 1.32E-31    | D0-D7   |
| PTCH1  | patched 1                                        | -1.756543 | 2.52E-06    | D18-D28 |
| SEMA3C | semaphorin 3C                                    | 6.3279462 | 2.14E-25    | D0-D7   |
| ABLIM3 | actin binding LIM protein family member 3        | 3.666142  | 2.06E-24    | D18-D28 |
| RGMA   | repulsive guidance molecule BMP co-receptor 4    | 3.1699685 | 3.81E-23    | D0-D7   |
| RGMA   | repulsive guidance molecule BMP co-receptor 4    | -1.414823 | 5.49E-05    | D18-D28 |
| BMP7   | bone morphogenetic protein 7                     | 3.7338339 | 5.36E-21    | D0-D7   |
| BOC    | BOC cell adhesion associated; oncogene regulator | 3.6519528 | 6.61E-19    | D0-D7   |
| BOC    | BOC cell adhesion associated; oncogene regulator | -2.03256  | 2.93E-06    | D18-D28 |
| WNT4   | Wnt family member 4                              | 4.4163769 | 1.07E-18    | D18-D28 |
| NRP1   | neuropilin 1                                     | 4.8760412 | 7.17E-18    | D0-D7   |
| EPHA5  | EPH receptor A5                                  | 1.8579666 | 5.15E-05    | D13-D18 |
| EPHA5  | EPH receptor A5                                  | 3.1553534 | 1.02E-17    | D18-D28 |
| SLIT1  | slit guidance ligand 1                           | 4.0577164 | 2.00E-16    | D0-D7   |
| SLIT1  | slit guidance ligand 1                           | 2.4589212 | 1.17E-07    | D7-D13  |
| UNC5B  | unc-5 netrin receptor B                          | -2.726278 | 1.84E-15    | D0-D7   |
| UNC5B  | unc-5 netrin receptor B                          | -2.349452 | 7.11E-09    | D7-D13  |
| UNC5B  | unc-5 netrin receptor B                          | 1.5039133 | 0.000414    | D18-D28 |
| EPHB3  | EPH receptor B3                                  | 3.5978021 | 1.69E-14    | D0-D7   |
| WNT5A  | Wnt family member 5A                             | 3.1875875 | 5.11E-10    | D0-D7   |
| WNT5A  | Wnt family member 5A                             | 3.6304262 | 8.45E-14    | D7-D13  |
| DCC    | DCC netrin 1 receptor                            | 2.2437511 | 0.002194971 | D0-D7   |
| DCC    | DCC netrin 1 receptor                            | 4.8911275 | 1.46E-13    | D7-D13  |
| SRGAP3 | SLIT-ROBO Rho GTPase activating protein 3        | 2.9931034 | 4.99E-13    | D0-D7   |
| SRGAP3 | SLIT-ROBO Rho GTPase activating protein 3        | 1.5512343 | 0.001152635 | D7-D13  |
| EPHA7  | EPH receptor A7                                  | 2.2808091 | 1.20E-11    | D0-D7   |
| FZD3   | frizzled class receptor 3                        | 1.3852612 | 1.21E-11    | D0-D7   |
| FZD3   | frizzled class receptor 3                        | -0.893768 | 3.75E-05    | D18-D28 |
| PLXNC1 | plexin C1                                        | 3.4560509 | 1.77E-11    | D0-D7   |
| SEMA3F | semaphorin 3F                                    | -4.361813 | 2.73E-11    | D0-D7   |
| SEMA5B | semaphorin 5B                                    | -2.173337 | 7.98E-11    | D18-D28 |
| SEMA6A | semaphorin 6A                                    | -2.608852 | 2.15E-10    | D0-D7   |
| SEMA6A | semaphorin 6A                                    | -1.458897 | 0.001264504 | D18-D28 |
| SLIT3  | slit guidance ligand 3                           | 3.1479361 | 2.35E-10    | D7-D13  |
| SLIT3  | slit guidance ligand 3                           | 2.139772  | 9.80E-05    | D13-D18 |
| SEMA3E | semaphorin 3E                                    | -3.322236 | 3.20E-10    | D7-D13  |
| EFNA5  | ephrin A5                                        | 3.7281509 | 1.87E-09    | D0-D7   |
| NFATC3 | nuclear factor of activated T cells 3            | -1.242584 | 2.36E-09    | D18-D28 |

|        |                                                  |           |             |         |
|--------|--------------------------------------------------|-----------|-------------|---------|
| WNT5B  | Wnt family member 5B                             | 3.6943043 | 4.18E-08    | D7-D13  |
| WNT5B  | Wnt family member 5B                             | -2.239568 | 0.001410133 | D18-D28 |
| CXCL12 | C-X-C motif chemokine ligand 12                  | -4.804959 | 1.09E-07    | D0-D7   |
| CXCL12 | C-X-C motif chemokine ligand 12                  | 4.6483449 | 5.53E-07    | D18-D28 |
| SEMA4F | semaphorin 4F                                    | 1.5413344 | 1.11E-07    | D18-D28 |
| CAMK2B | calcium/calmodulin dependent protein kinase I    | 2.5515258 | 2.84E-07    | D18-D28 |
| ITGB1  | integrin subunit beta 1                          | -1.180398 | 1.54E-06    | D0-D7   |
| ITGB1  | integrin subunit beta 1                          | 0.8945123 | 0.000513349 | D18-D28 |
| LRRC4C | leucine rich repeat containing 4C                | 3.0481671 | 2.87E-06    | D0-D7   |
| CAMK2D | calcium/calmodulin dependent protein kinase I    | 2.4776227 | 3.05E-06    | D0-D7   |
| UNC5C  | unc-5 netrin receptor C                          | 3.4579258 | 4.59E-06    | D7-D13  |
| PLXNA3 | plexin A3                                        | 1.4704294 | 4.68E-06    | D0-D7   |
| SSH3   | slingshot protein phosphatase 3                  | -2.368169 | 5.27E-06    | D0-D7   |
| EPHA8  | EPH receptor A8                                  | -3.724491 | 6.57E-06    | D0-D7   |
| EPHA8  | EPH receptor A8                                  | 4.1445589 | 0.001382195 | D18-D28 |
| PIK3CD | phosphatidylinositol-4;5-bisphosphate 3-kinase   | -1.981173 | 1.22E-05    | D0-D7   |
| PIK3CD | phosphatidylinositol-4;5-bisphosphate 3-kinase   | 2.0421683 | 1.11E-05    | D18-D28 |
| SEMA6D | semaphorin 6D                                    | 2.935058  | 1.12E-05    | D7-D13  |
| CAMK2A | calcium/calmodulin dependent protein kinase I    | 3.6297257 | 1.74E-05    | D0-D7   |
| PLCG2  | phospholipase C gamma 2                          | -1.90095  | 1.80E-05    | D0-D7   |
| PIK3R1 | phosphoinositide-3-kinase regulatory subunit 1   | 1.9165959 | 1.84E-05    | D0-D7   |
| ABLIM2 | actin binding LIM protein family member 2        | 2.1998176 | 1.86E-05    | D7-D13  |
| FYN    | FYN proto-oncogene; Src family tyrosine kinase   | 1.7084434 | 1.96E-05    | D0-D7   |
| NTNG1  | netrin G1                                        | 3.4838763 | 2.07E-05    | D13-D18 |
| NTN1   | netrin 1                                         | 2.4645416 | 3.41E-05    | D0-D7   |
| NTN1   | netrin 1                                         | 2.2517479 | 0.000215092 | D7-D13  |
| RHOD   | ras homolog family member D                      | -4.7653   | 5.88E-05    | D0-D7   |
| PTPN11 | protein tyrosine phosphatase non-receptor type C | -0.931659 | 0.000144629 | D0-D7   |
| ABLIM1 | actin binding LIM protein 1                      | 1.7143905 | 0.000181365 | D18-D28 |
| L1CAM  | L1 cell adhesion molecule                        | 1.9835491 | 0.000295421 | D18-D28 |
| PAK3   | p21 (RAC1) activated kinase 3                    | 1.8007917 | 0.000319969 | D7-D13  |
| MYL12B | myosin light chain 12B                           | 1.4220522 | 0.000450582 | D18-D28 |
| PLXNA4 | plexin A4                                        | 2.5016083 | 0.000492681 | D13-D18 |
| ROBO2  | roundabout guidance receptor 2                   | -1.935829 | 0.001094884 | D0-D7   |
| ROBO2  | roundabout guidance receptor 2                   | 2.1429616 | 0.000571177 | D7-D13  |
| ROBO1  | roundabout guidance receptor 1                   | 1.7501016 | 0.000623942 | D7-D13  |
| DPYSL2 | dihydropyrimidinase like 2                       | 1.1263625 | 0.000737866 | D18-D28 |
| BMPR1B | bone morphogenetic protein receptor type 1B      | 2.9637636 | 0.000871988 | D0-D7   |
| PAK2   | p21 (RAC1) activated kinase 2                    | 0.4974171 | 0.000923861 | D0-D7   |
| SEMA3D | semaphorin 3D                                    | -1.463013 | 0.000963853 | D18-D28 |
| BMPR2  | bone morphogenetic protein receptor type 2       | 1.2056288 | 0.001013353 | D7-D13  |
| PAK5   | p21 (RAC1) activated kinase 5                    | 1.8513363 | 0.001761489 | D0-D7   |
| PAK5   | p21 (RAC1) activated kinase 5                    | 1.8751321 | 0.00102225  | D7-D13  |
| MYL12A | myosin light chain 12A                           | -1.595308 | 0.001030513 | D0-D7   |

|        |                                               |           |             |         |
|--------|-----------------------------------------------|-----------|-------------|---------|
| CXCR4  | C-X-C motif chemokine receptor 4              | 2.9330094 | 0.001076283 | D0-D7   |
| PTK2   | protein tyrosine kinase 2                     | -1.755081 | 0.001080391 | D18-D28 |
| PARD3  | par-3 family cell polarity regulator          | -2.064866 | 0.001381965 | D18-D28 |
| NTN4   | netrin 4                                      | 1.671894  | 0.001548795 | D7-D13  |
| LIMK2  | LIM domain kinase 2                           | 0.79945   | 0.001623585 | D18-D28 |
| EPHB4  | EPH receptor B4                               | -1.257105 | 0.001841581 | D0-D7   |
| CAMK2G | calcium/calmodulin dependent protein kinase I | -0.69982  | 0.00186652  | D0-D7   |
| SEMA4A | semaphorin 4A                                 | -1.902545 | 0.001957459 | D0-D7   |
| RYK    | receptor like tyrosine kinase                 | -0.746973 | 0.002093434 | D18-D28 |

| Gene    | Description                                         | LogFC       | p-adjusted  | Time    |
|---------|-----------------------------------------------------|-------------|-------------|---------|
| SLC5A7  | solute carrier family 5 member 7                    | 7.560729164 | 9.27E-08    | D7-D13  |
| SLC5A7  | solute carrier family 5 member 7                    | 3.510584028 | 2.95E-17    | D13-D18 |
| SLC5A7  | solute carrier family 5 member 7                    | 2.32643969  | 1.16E-09    | D18-D28 |
| ITPR3   | inositol 1;4;5-trisphosphate receptor type 3        | -3.49098828 | 8.18E-17    | D0-D7   |
| KCNJ12  | potassium inwardly rectifying channel subfamily J r | 3.708715056 | 1.34E-15    | D0-D7   |
| KCNJ12  | potassium inwardly rectifying channel subfamily J r | -1.61151176 | 0.000291907 | D18-D28 |
| FOS     | Fos proto-oncogene; AP-1 transcription factor subur | -2.71477208 | 8.88E-08    | D7-D13  |
| FOS     | Fos proto-oncogene; AP-1 transcription factor subur | 3.6919292   | 8.79E-15    | D18-D28 |
| CHRNA4  | cholinergic receptor nicotinic beta 4 subunit       | 2.909827054 | 9.15E-15    | D0-D7   |
| CHRNA4  | cholinergic receptor nicotinic beta 4 subunit       | -2.0305826  | 2.18E-07    | D18-D28 |
| CHRM3   | cholinergic receptor muscarinic 3                   | 4.430227476 | 6.15E-14    | D18-D28 |
| CHRNA3  | cholinergic receptor nicotinic alpha 3 subunit      | 2.498934037 | 1.12E-13    | D0-D7   |
| CHRNA3  | cholinergic receptor nicotinic alpha 3 subunit      | -1.39435502 | 5.00E-05    | D18-D28 |
| ITPR2   | inositol 1;4;5-trisphosphate receptor type 2        | -3.95694995 | 2.90E-10    | D0-D7   |
| PIK3R5  | phosphoinositide-3-kinase regulatory subunit 5      | -4.80855386 | 2.35E-08    | D0-D7   |
| CREB3L1 | cAMP responsive element binding protein 3 like 1    | -3.92509521 | 3.40E-08    | D7-D13  |
| CREB3L1 | cAMP responsive element binding protein 3 like 1    | 3.554690755 | 7.72E-05    | D18-D28 |
| CHAT    | choline O-acetyltransferase                         | 3.721443261 | 6.37E-08    | D13-D18 |
| PLCB3   | phospholipase C beta 3                              | -2.48124947 | 1.46E-07    | D0-D7   |
| CAMK2B  | calcium/calmodulin dependent protein kinase II bet  | 2.551525784 | 2.84E-07    | D18-D28 |
| GNB5    | G protein subunit beta 5                            | 1.284669714 | 2.89E-07    | D18-D28 |
| ADCY2   | adenylate cyclase 2                                 | -3.35866007 | 1.03E-06    | D0-D7   |
| ADCY2   | adenylate cyclase 2                                 | 2.269125132 | 0.004367872 | D7-D13  |
| CAMK2D  | calcium/calmodulin dependent protein kinase II del  | 2.477622663 | 3.05E-06    | D0-D7   |
| ACHE    | acetylcholinesterase (Cartwright blood group)       | 4.134748517 | 4.64E-06    | D18-D28 |
| PIK3CD  | phosphatidylinositol-4;5-bisphosphate 3-kinase cata | -1.98117285 | 1.22E-05    | D0-D7   |
| PIK3CD  | phosphatidylinositol-4;5-bisphosphate 3-kinase cata | 2.042168335 | 1.11E-05    | D18-D28 |
| ADCY5   | adenylate cyclase 5                                 | -1.77098837 | 1.62E-05    | D0-D7   |
| CAMK2A  | calcium/calmodulin dependent protein kinase II alp  | 3.629725689 | 1.74E-05    | D0-D7   |
| CREB5   | cAMP responsive element binding protein 5           | 3.050694623 | 1.83E-05    | D0-D7   |
| PIK3R1  | phosphoinositide-3-kinase regulatory subunit 1      | 1.916595917 | 1.84E-05    | D0-D7   |
| FYN     | FYN proto-oncogene; Src family tyrosine kinase      | 1.708443397 | 1.96E-05    | D0-D7   |
| KCNQ3   | potassium voltage-gated channel subfamily Q meml    | -2.59979651 | 3.37E-05    | D0-D7   |
| KCNQ3   | potassium voltage-gated channel subfamily Q meml    | 2.53574465  | 3.08E-05    | D18-D28 |
| KCNQ4   | potassium voltage-gated channel subfamily Q meml    | -2.02625827 | 4.33E-05    | D18-D28 |
| CAMK4   | calcium/calmodulin dependent protein kinase IV      | 1.963054447 | 4.94E-05    | D7-D13  |
| GNB4    | G protein subunit beta 4                            | -1.28635287 | 0.000127613 | D0-D7   |
| BCL2    | BCL2 apoptosis regulator                            | 2.081651837 | 0.000217577 | D0-D7   |
| GNG2    | G protein subunit gamma 2                           | 1.521420247 | 0.000223348 | D18-D28 |
| CACNA1B | calcium voltage-gated channel subunit alpha1 B      | 2.117180199 | 0.000229332 | D7-D13  |
| ADCY8   | adenylate cyclase 8                                 | 3.258898062 | 0.000316714 | D7-D13  |
| PLCB1   | phospholipase C beta 1                              | 2.574138469 | 0.00038703  | D0-D7   |
| AKT3    | AKT serine/threonine kinase 3                       | 2.154222976 | 0.000645425 | D7-D13  |

|         |                                                     |             |             |         |
|---------|-----------------------------------------------------|-------------|-------------|---------|
| PLCB2   | phospholipase C beta 2                              | -2.29651184 | 0.000650156 | D0-D7   |
| KCNQ2   | potassium voltage-gated channel subfamily Q meml    | 2.035857889 | 0.004736327 | D13-D18 |
| KCNQ2   | potassium voltage-gated channel subfamily Q meml    | 1.916267762 | 0.000728956 | D18-D28 |
| KCNJ3   | potassium inwardly rectifying channel subfamily J r | -5.46245102 | 0.001258865 | D0-D7   |
| KCNJ3   | potassium inwardly rectifying channel subfamily J r | 5.191745884 | 0.005497039 | D7-D13  |
| CAMK2G  | calcium/calmodulin dependent protein kinase II gar  | -0.69982029 | 0.00186652  | D0-D7   |
| ADCY6   | adenylate cyclase 6                                 | 1.191898035 | 0.003320181 | D18-D28 |
| CHRM2   | cholinergic receptor muscarinic 2                   | 5.066906028 | 0.00415318  | D0-D7   |
| CREB3L4 | cAMP responsive element binding protein 3 like 4    | -1.47750393 | 0.005392742 | D0-D7   |
| CACNA1D | calcium voltage-gated channel subunit alpha1 D      | 1.928157408 | 0.00548549  | D0-D7   |
